# Supplementary material
Source: PubMed Central journal article supplement (PMC4066518)
Supplement: 1402210111_pnas.201402210SI.pdf [file 1402210111_pnas.201402210SI.pdf]

# Supporting Information

Chung et al. 10.1073/pnas.1402210111

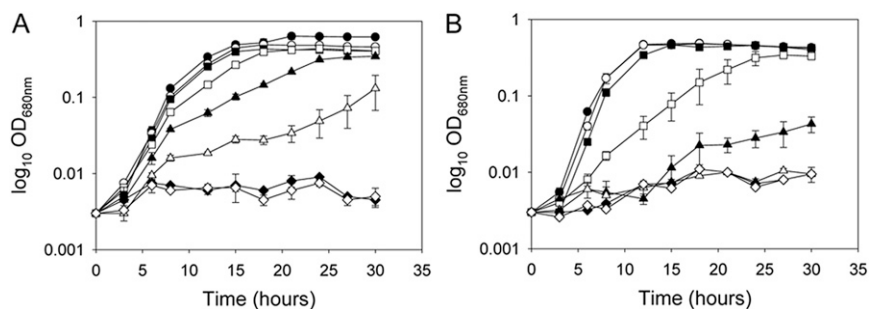

**Fig. S1.** Analysis of ethanol tolerance of the *Caldicellulosiruptor bescii* wild-type DSM 6725. Growth of *C. bescii* on 1% cellobiose as the carbon source with different amounts of ethanol at 65 °C (A) and 75 °C (B) monitored by measuring culture turbidity ( $\log_{10}$  OD<sub>680nm</sub>). ●, no ethanol; ○, 200 mM; ■, 300 mM; □, 400 mM; ▲, 450 mM; △, 500 mM; ◆, 600 mM; ◇, 700 mM. Error bars based on two biologically independent experiments.

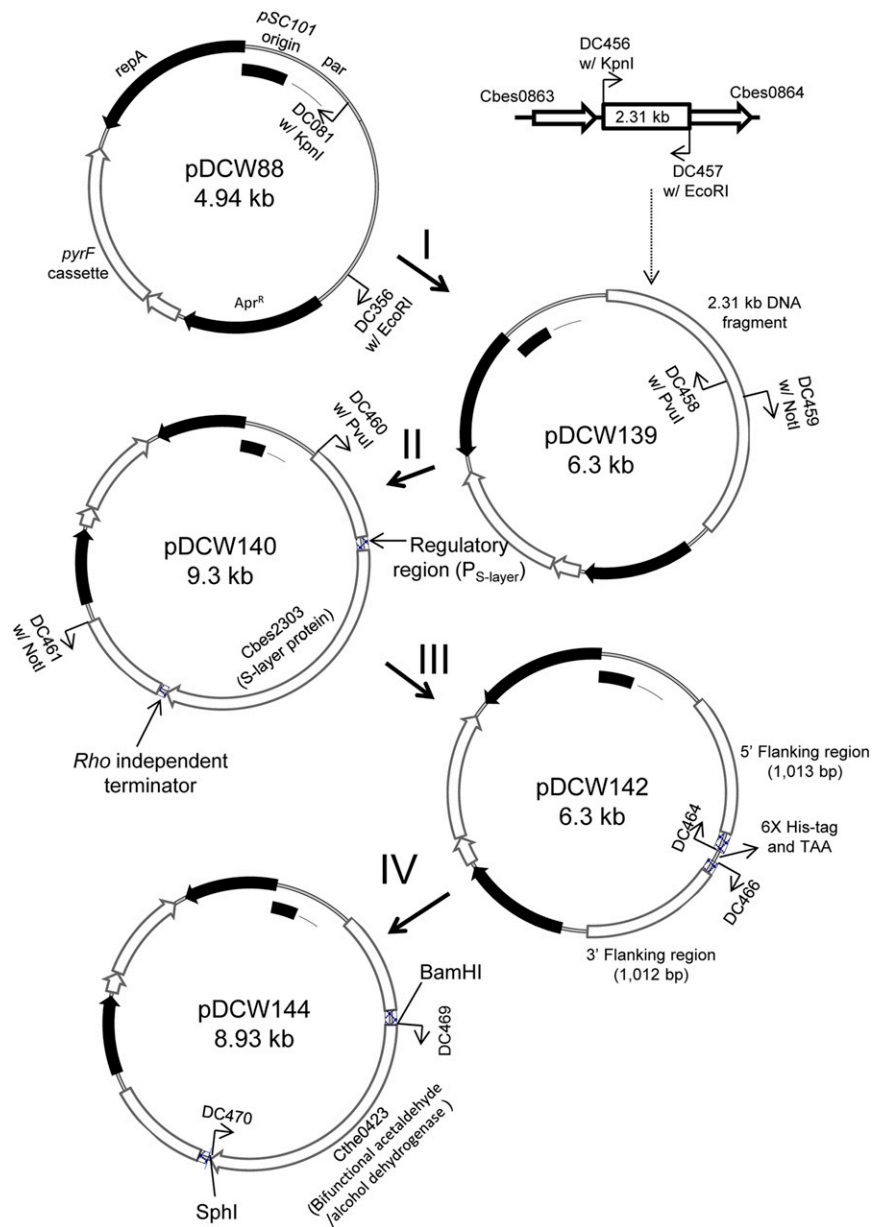

**Fig. S2.** Construction of knock-in vector pDCW144. Plasmid pDCW144 was constructed in four cloning steps. ORFs from *C. bescii* and *Clostridium thermocellum* are indicated as empty arrows. ORFs from *Escherichia coli* indicated as black arrows.  $Apr^R$ , the apramycin-resistant gene cassette; *pSC101*, low-copy replication origin in *E. coli*; *repA*, a plasmid-encoded gene required for *pSC101* replication; *par*, partition locus; *pyrF* cassette; 5' and 3' flanking sequences of the targeted insertion site in *C. bescii* chromosome; regulatory and *rho* independent terminator sequences surrounding *Cbes2303* (marked as a cross-hatched box); C-terminal 6x Histidine-tag in front of stop codon are indicated. All primers and two restriction sites (*Bam*HI and *Sph*I) used in this construction are also indicated.



**Table S3. Data supporting values for carbon balance at 48-h fermentation**

| Strains | Concentrations of residual compounds (at 48 h) (mM) |                            |             |                                  |            |            |             |             |        | Product yields (mol/mol) |           |           |           |
|---------|-----------------------------------------------------|----------------------------|-------------|----------------------------------|------------|------------|-------------|-------------|--------|--------------------------|-----------|-----------|-----------|
|         | Cellobiose<br><i>initial</i>                        | Cellobiose<br><i>final</i> | Glucose     | Cellobiose<br><i>catabolized</i> | Lactate    | Acetate    | Ethanol     | Hydrogen    | CR (%) | $Y_{L/C}$                | $Y_{A/C}$ | $Y_{E/C}$ | $Y_{H/C}$ |
| JWCB001 | 28.4 ± 0.11                                         | 18.9 ± 0.42                | 15.0 ± 0.78 | 2.0 ± 0.28                       | 1.3 ± 0.07 | 6.9 ± 0.23 | 0.0         | 11.8 ± 0.21 | 103    | 0.65                     | 3.45      | 0.0       | 5.90      |
| JWCB018 | 28.4 ± 0.36                                         | 19.7 ± 0.27                | 12.9 ± 0.67 | 2.3 ± 0.22                       | 0.0        | 9.3 ± 0.56 | 0.0         | 14.5 ± 0.53 | 103    | 0.0                      | 4.05      | 0.0       | 6.30      |
| JWCB032 | 28.4 ± 0.25                                         | 16.9 ± 1.57                | 13.4 ± 0.81 | 4.8 ± 1.71                       | 0.0        | 5.5 ± 0.30 | 15.3 ± 0.19 | 9.8 ± 0.64  | 107    | 0.0                      | 1.14      | 3.19      | 2.04      |

Substrate and product concentration of JWCB001, 018, and 032 are reported in millimolarity, with average percent carbon recovery (CR) and average yields in mol/mol. The fermentation conditions were as described in *Methods*. Product yields are calculated as:  $Y_{L/C}$ , lactate yield per mole cellobiose;  $Y_{A/C}$ , acetate yield per mole cellobiose;  $Y_{E/C}$ , ethanol yield per mole cellobiose;  $Y_{H/C}$ , hydrogen yield per mole cellobiose. SDs based on two biologically independent experiments.

**Table S4. Primers used in this study**

| Primers | Sequences (5' to 3')                                      | Description                               |
|---------|-----------------------------------------------------------|-------------------------------------------|
| DC081   | TCCAATGATCGAAGTTAGGCTGGT                                  | To construct pDCW139                      |
| DC356   | TCTGAATTCTCTGACGCTCAGTGGAAACGAA                           | To construct pDCW139                      |
| DC456   | AGAGGTACCTGTGAGGGCATGTCAATTTACGA                          | To construct pDCW139                      |
| DC457   | AGAGAATTCTCTTTTCGATGGAATCTTCTTCGGA                        | To construct pDCW139                      |
| DC458   | AGAGAGCGATCGTCTATTGTAACCTTCACTTCAGTGCA                    | To construct pDCW140                      |
| DC459   | AGAAGAAGGCGCCGCTGGAAGAAGCTTCAAAGCAGGCT                    | To construct pDCW140                      |
| DC460   | AGAGAGCGATCGACAGTTTGATTACAGTTTAGTCAGAGCT                  | To construct pDCW140                      |
| DC461   | AGAAGAAGGCGCCGCTTGTTTCTTAAATCTAAGAGGTATGA                 | To construct pDCW140                      |
| DC462   | TGCTGGCAGAGAAGAGCGAAA                                     | Sequencing primer for pDCW140             |
| DC463   | TCTTCATCCCAATCTTCAACTTC                                   | Sequencing primer for pDCW140             |
| DC464   | ACTGGATCCCTCACCAAACCTCCTTGTATGAT                          | To construct pDCW142                      |
| DC466   | AGAGCATGCCATCACCATCACCATCACTAATAATAAGCTGAAATAAAGAGGGTGAGA | To construct pDCW142                      |
| DC469   | ACTGGATCCATGACGAAAATAGCGAATAAATACGAAGT                    | To construct pDCW144 and 145              |
| DC470   | AGAGCATGCTTTCTTCGCACCTCCGTAATAAGCGTTCAGA                  | To construct pDCW144 and 145              |
| DC471   | TGGTAATGAGAGAAGCAGATG                                     | Sequencing primer for pDCW144 and 145     |
| DC472   | TGATAAAAAGCACCCAGTTTGT                                    | Sequencing primer for pDCW144 and 145     |
| DC477   | TGGTTGACCAGGAGAATTTTACACA                                 | Sequencing primer to verify the insertion |
| DC478   | AGCAACAATCTGCATTTGTAAG                                    | Sequencing primer to verify the insertion |
